# Supplementary material for: Identification, Replication, and Functional Fine-Mapping of Expression Quantitative Trait Loci in Primary Human Liver Tissue
Source: PLoS Genet. 2011 May 26;7(5):e1002078. doi: 10.1371/journal.pgen.1002078 (PMC3102751; doi:10.1371/journal.pgen.1002078)
Supplement: Table S2 — Expression probe re-sequencing. (XLSX) [file pgen.1002078.s014.xlsx]

## Sheet: Sheet1
Old Index	Gene	UC BF	UW BF	Merck	ProbeName	ProbeSeq	dbSNP	Multiple BLAT	Start	Stop	Chr	Strand	Reseq SNP?
31	MYO7A	31.067	1.374	1	A_23_P422350	GAGAAGATCCCTGTGATGACCAAGATTTATGAGACCCTGGGCAAGAAGACGTACAAGAGG	NA		76571204	76571263	11	p	NO
44	SAR1A	22.327	1.554	1	A_32_P16451	TTTCCAAACCAACAACTTTGTCTTAATCCAGCTATGTTTGCTAATAAACGAAATGCATGC	NA		71580485	71580544	10	p	NO
42	RPS10	16.584	1.591	1	A_32_P78575	ATACCCTCATTGGTAAGGTACCAGTAGAAATGTCTCCAGGCAAACTGTTCCTTCACGTAG	NA	mult	34820098	34820157	8	m	NO, BUT AMBIGUOUS
74	CFLAR	21.487	1.681	1	A_23_P209394	AATCTGGTTGCCCCAGATCAACTGGATTTATTAGAAAAATGCCTAAAGAACATCCACAGA	NA		201708976	201709035	2	p	NO
177	GFER	14.025	1.825	1	A_24_P31003	TTCAGTATATTTTCTGCTGGGGCTTAATAAAGCAGTAGACAGGGCTTGTTCCATCCCTCT	NA		1976686	1976745	16	p	NO
181	SNX13	23.143	1.829	1	A_24_P200848	AATTAGGATATTCCAAATAGTTGCTGAAATCAATTGTGCCATTGACCAATGGATGCACTT	NA		17797563	17797622	7	m	NO
92	PPAT	20.85	2.006	1	A_23_P80940	CATTGTACAGCTTGTCTCACTGGAAAATATCCTGTAGAATTAGAATGGTAGCTGGTAGGG	NA	mult	56956266	56956325	4	m	NOT SEQ
171	SEC14L1	14.447	2.067	1	A_24_P237766	GTTTGCTCTTAGAGATCGAGCTCCTCAGTGGTACCTGAAGCCTTTGCTTCCGGAAAGCGC	NA		72723331	72723390	17	p	NOT SEQ
162	LYNX1	19.944	2.335	1	A_23_P111981	TCAGCTGGTCGTGGGCATAAGTGCCCGCTGAATGGATGGCATCTCTCCCTCCTGTCTTAT	NA		143849742	143849801	8	m	NO
25	GTPBP5	24.357	2.646	1	A_24_P391229	ACGGAGGCAACGGTGGACACGTCATTCTGAGAGTTGACCAGCAAGTCAAGTCCCTGTCGT	NA		60204368	60206329	20	p	NOT SEQ
118	FLJ40504	1.716	4.158	1	1400678	TGGGCCCAATATGACGAGCTGGCTCCGAAGAACTTAGAGGAGCTGGGCAA	NA		23627692	23627741	17	m	NO
41	CBS	3.376	6.015	1	5810164	CTCCCGTCTTCCTCCTCCCCTGGCAACTGCTGATCGACTTTGTGTCTCTG	NA		43346426	43346475	21	m	NO
26	KCTD10	3.672	6.803	1	6450050	CAACAGCGATTCAGGACCCAAGTGTGAACAACACTCAGCCCGCCCTCTGG	NA		108371008	108371057	12	m	NO
129	HCCA2	2.118	4.065	1	4280452	CTTCCTGCTGCCTCCTCCATGCCCAAGGAACACCCATGGTGCAGTCCTCA	NA		1447379	1447428	11	m	NO
20	BTBD2	2.012	7.355	1	7610639	CCAAAGCCATGGGAGGGGTGTCCTCCTCAGACCATGCCCCCAGATGATTT	NA		1936475	1936524	19	m	NO
135	ALDOA	2.35	4.002	1	3850379	AGTCAAGGGAGGAGGGAGATTAGAGAAGGAGCCAGGGAGGGTGGCAGGGA	NA		29983154	29983203	16	p	NO
85	GLYAT	2.724	4.604	1	2070390	ACGCATTCTCTATATGGCAGCTGAAACAGCCAAGGAACTGACTCCTTTCC	NA		58234688	58234737	11	m	NOT SEQ
114	TRAF3IP2	2.383	4.174	1	2370221	CTTGTGATGGCGTGAAGGAAAGCCATGGCAGATTTCCAGCCTGGTGATGC	NA		112029138	112029187	6	m	NO
134	ZNF274	2.029	4.01	1	7610563	TGAGTGAGGACATTCCCAAAACCAAAGGACAACTGAGGAGACTGCCCAGC	NA		63416424	63416473	19	p	NO
28	INPP5E	2.511	6.759	1	70379	CCGTTTGCTTCTTTAACTCCAGCCGCGGAATGACATTAGTGGAACCGGGC	NA		138443134	138443183	9	m	NO

## Sheet: Sheet2
LYNX1	NM_177458	2470722			701	0.7178	-0.029078	AG;GG
CBS	NM_000071	5810164	_	_	618_639	2.5835e-06	-0.577119274080697_0.577119274080697	AA;AG;GG_AA;AG;GG
CD151	NM_004357	4830504		821809	4858	0.0004	-0.434103	GG;GT;TT
INPP5E	NM_019892	70379			548	1.5653e-08	0.431778	CC;CT;TT
PLTP	NM_006227	3130154		43975502	3692	0.0001	-0.676071	AA;AT;TT
MYO7A	NM_000260	510300			730	0.9615	0.00573877	--;A-;AA
ATXN3	NM_030660	670598		91599550	45158	2.717e-05	1.26472	AG;GG
LYNX1	NM_177477	3840097			701	0.7911	-0.0272794	AG;GG
PLTP	NM_006227	5690102		43975502	3692	0.0054	-0.11044	AA;AT;TT
IL12RB1	NM_005535	5670647			2368	0.1404	-0.0391778	AA;AG;GG
ERMAP	NM_001017922	5420201		43083226	22392	1.4226e-05	-0.288235	AA;AG;GG
IL12RB1	NM_005535	5390433			31314	0.5204	0.011609	CC;CT;TT
CD151	NM_139030	1980180		821809	4858	2.0227e-05	-0.302679	GG;GT;TT
TRAF3IP2	NM_147200	2370221			608	0.5496	0.0747873	CG;GG
IL12RB1	NM_153701	2370639			2368	0.1181	-0.0558837	AA;AG;GG
BTBD2	NM_017797	7610639			473	0.2297	-0.29194	CC;CT
ERMAP	NM_001017922	7160646		43083111	22277	0.0124	-0.260168	AAT-;AATAAT
SAR1A	NM_020150	5420681			734	0.2143	0.0717963	CC;CT;TT
TRAF3IP2	NM_147200	1240504			608	0.4246	0.384659	CG;GG
KCTD10	NM_031954	6450050			528	9.3364e-13	-0.44374	AA;AG;GG
GPX7	NM_015696	3830538		52840502	2871	4.8003e-08	0.421983	GG;GT;TT
LYNX1	NM_177476	2900327			701	0.7045	-0.0259	AG;GG
GFER	NM_005262	3830167			528	0.3892	0.0817243	CC;CT
RPS10	NM_001014	6660220			662	0.5134	-0.0133122	CC;CT;TT
SELE	NM_000450	5860224		167958745	13059	2.0313e-05	0.880284	CC;CG
TRAF3IP2	NM_147686	2970687			608	0.6597	0.0413484	CG;GG
